# Supplementary material for: The Economic Burden of Insulin Injection-Induced Lipohypertophy. Role of Education: The ISTERP-3 Study
Source: PubMed Central journal article supplement — Adv Ther. 2022 Mar 19;39(5):2192–207. doi: 10.1007/s12325-022-02105-5 (PMC9056437; doi:10.1007/s12325-022-02105-5), 2022-03-19
Supplement: 12325_2022_2105_MOESM1_ESM.pdf [file 12325_2022_2105_MOESM1_ESM.pdf]

**THE ECONOMIC BURDEN OF INSULIN INJECTION-INDUCED LIPOHYPERTOPHY.  
ROLE OF EDUCATION: THE ISTERP-3 STUDY.**

*Sandro Gentile, Giuseppina Guarino, Teresa Della Corte, Giampiero Marino, Ersilia Satta, Maria Pasquarella, Carmine Romano, Carmelo Alfrone, Laura Giordano, Fabrizio Loiacono, Maurizio Capece, Rossella Lamberti, Felice Strollo*  *on behalf of Nefrocenter and Nyx Start-up, AMD-OSDI\* Study Group on Injection Techniques, and ANIAD\*\**

*S. Gentile \_ G. Guarino \_ T. Della Corte \_ E. Satta \_ M. Pasquarella \_ C. Romano \_ C. Alfrone  
Nefrocenter Research and Nyx Start-Up, Naples, Italy*

*S. Gentile \_ G. Guarino \_ T. Della Corte \_ G. Marino Department of Internal Medicine, Campania  
University "Luigi Vanvitelli", Naples, Italy*

*E. Satta\_ Polyspecialistic Nephrologic Center CNP Srl, Fratta Maggiore, Italy*

*L. Giordano\_ Emodialysis Center Srl, Nefrocenter Network, Naples, Italy*

*F. Loiacono Nefrocenter Research, Naples, Italy*

*M. Capece Vomero Center Crisci Bersabea & C SNC, Nefrocenter Network, Naples, Italy*

*R. Lamberti Metelliano Medical Center, Nefrocenter Network, Naples, Italy*

*F. Strollo (&) Endocrinology and Diabetes, IRCCS San Raffaele Pisana, Rome, Italy  
e-mail: [felix.strollo@gmail.com](mailto:felix.strollo@gmail.com)  corresponding author*

*\* AMD = Associazione Medici Diabetologi (Italian Association of Diabetes Specialists) - OSDI = Operatori Sanitari di Diabetologia Italiani (Italian Diabetes Healthcare Professionals)*

*\*\* ANIAD = Associazione Nazionale Italiana Atleti Diabetici (Italian National Association of Athletes with Diabetes)*

## Education

Each general IT education group session involved ten people, lasted approximately 60 minutes, and employed BD Educational Starter Kits (Becton Dickinson, Inc., Franklin Lakes, NJ, USA), including site rotation grids and educational injection techniques leaflets, and a blood glucose logbook. The LH “look and feel” teaching method used a BD Lipobox, which provided visual and tactile clues for identifying typical LH lesions. After learning how to rotate injection sites correctly and being instructed not to reuse needles to avoid generating new LHs or worsening existing LHs, all patients received a leaflet with bullet points highlighting the role of IT in optimizing glucose control through unaltered insulin pharmacokinetics and pharmacodynamics [9,33]. An individualized training session then followed addressing real-life problems that affect injection pen handling, including cheiroarthropathy, dysphoria, and reduced self-sufficiency. This stage focused on the relevance of (i) palpating the skin before injection to avoid thicker/stiffer sites or LH nodules, (ii) keeping the pen button pressed down for at least 10 sec at the end of the injection, (iii) performing all previously learned IT-related maneuvers autonomously while exploiting any cm<sup>2</sup> of healthy skin sequentially, (iv) adjusting the insulin dose as needed, and (v) using the unexplained hypoglycemia and glycemic variation wheel developed by the Forum for Injection Technique (FIT) [34]. Trained HCPs tested participants for their adherence to the three usual insulin titration protocol rules (see below) using a validated questionnaire that included the following four closed answers: (1) no; (2) yes; (3) yes most of the time; (4) no most of the time. Answers (1) and (4) were recorded as “no” the other two answers were recorded as “yes” as previously described [35].

34) Forum for injection Technique (FIT). <https://www.fit4diabetes.com/about-this-site/>. Accessed December 23, 2021

35) International Forum for Injection Technique (FITTER; Rome 2015) Optimize insulin delivery to help improve your patients’ lives and reduce the burden of care. Rome 2015. <https://www.fitter4diabetes.com/pages/the-rome-congress>. Accessed December 23, 2021

**Table 1S.** Cost comparison among various care activities required for the CG and the IG for severe and symptomatic hypoglycemia in the three subsequent 6-month observation periods (pre-randomization [T-6/T0]; first [T0/T+6] and second [T+6/T+12] follow up semesters). Costs were calculated from average National Health Service rates, as already reported (19). PHV = physician home visit; ER = emergency room visit and treatment; EMS = emergency medical service call; FM= family member; C = caregiver: WD = working day; DMC = daily hospitalization cost.

| Event type     | Cost/Event (€) | Control Group n.318 |              |           |                |           |                |                   |             |            |               |            |               | Intervention Group n. 395 |                |           |                |           |                |                   |             |           |               |           |            |
|----------------|----------------|---------------------|--------------|-----------|----------------|-----------|----------------|-------------------|-------------|------------|---------------|------------|---------------|---------------------------|----------------|-----------|----------------|-----------|----------------|-------------------|-------------|-----------|---------------|-----------|------------|
|                |                | Severe Hypos        |              |           |                |           |                | Symptomatic Hypos |             |            |               |            |               | Severe Hypos              |                |           |                |           |                | Symptomatic Hypos |             |           |               |           |            |
|                |                | T-6/T0              |              | T0/T+6    |                | T+6/T+12  |                | T-6/T0            |             | T0/T+6     |               | T+6/T+12   |               | T-6/T0                    |                | T0/T+6    |                | T+6/T+12  |                | T-6/T0            |             | T0/T+6    |               | T+6/T+12  |            |
|                | Events n.      | €                   | Events n.    | €         | Events n.      | €         | Events n.      | €                 | Events n.   | €          | Events n.     | €          | Events n.     | €                         | Events n.      | €         | Events n.      | €         | Events n.      | €                 | Events n.   | €         | Events n.     | €         |            |
|                |                | <b>89</b>           |              | <b>72</b> |                | <b>80</b> |                | <b>316</b>        |             | <b>277</b> |               | <b>311</b> |               | <b>91</b>                 |                | <b>38</b> |                | <b>12</b> |                | <b>308</b>        |             | <b>59</b> |               | <b>25</b> |            |
| PHV            | 25.8           | 28                  | 722.4        | 25        | 712.5          | 27        | 696.6          | 96                | 2476        | 79         | 2038.2        | 88         | 2270.4        | 20                        | 516            | 12        | 309.6          | 6         | 1548           | 93                | 2399.4      | 18        | 464.4         | 8         | 206.4      |
| ER             | 241.0          | 85                  | 20485        | 83        | 20002          | 84        | 20.244         | 2                 | 482         | 1          | 241           | 1          | 241           | 91                        | 21931          | 40        | 9640           | 3         | 723            | 2                 | 482         | 1         | 241           | 0         | 0          |
| EMS            | 128.5          | 16                  | 2056         | 15        | 1926.5         | 16        | 2.056          | 0                 | 0           | 0          | 0             | 0          | 0             | 17                        | 2184.5         | 14        | 1799           | 7         | 899.5          | 0                 | 0           | 0         | 0             | 0         | 0          |
| FM/C           |                |                     |              |           |                | 348       | 27.352,8       | 80                | 6288        | 65         | 5109          | 70         | 5502          | 370                       | 29082          | 116       | 9117.6         | 80        | 6120           | 82                | 6445.6      | 13        | 1670.5        | 6         | 471.6      |
| WD             | 78.6           | 356                 | 27981.6      | 333       | 25173.8        |           |                |                   |             |            |               |            |               |                           |                |           |                |           |                |                   |             |           |               |           |            |
| DHC            | 750            | 24                  | 18000        | 23        | 17.250         | 24        | 18.000         | 0                 | 0           | 0          | 0             | 0          | 0             | 25                        | 18750          | 14        | 10500          | 5         | 3750           | 0                 | 0           | 0         | 0             | 0         | 0          |
| Total cost (€) |                |                     | <b>69245</b> |           | <b>66064.8</b> |           | <b>68349.4</b> |                   | <b>9246</b> |            | <b>7388.2</b> |            | <b>8013.4</b> |                           | <b>77107.5</b> |           | <b>20866.2</b> |           | <b>13045.5</b> |                   | <b>9327</b> |           | <b>2375.9</b> |           | <b>678</b> |
| Δ%             |                |                     |              |           | -4.6           |           | -1.3           |                   |             |            | -20.1         |            | -13.3         |                           |                |           | -72.9          |           | -83.1          |                   |             |           | -74.5         |           | -92.7      |
